# Supplementary material for: Sex Differences in Behavior and Learning Abilities in Adult Rats
Source: MDPI journal article supplement (doi:10.3390/life13020547), 2023-02-15
Supplement: s1 [file s1]

## Supplementary S1. Electroencephalographic examination in Group 2.

High voltage spike-wave discharges (SWD) in EEG are the hallmark of seizure activity in the mother WAG/Rij rat strain. 11-24 hours of EEG. This part of study was done in NEW rats from Group 2. In one male recording was not successful. In total, 6 males and 8 females of Group 2 were examined for the presence of spike-wave EEG abnormalities in their electroencephalograms (EEGs). Rats were implanted with chronic epidural electrodes for 3-channel recordings in free behavior. After a 10-14 day recovery period, rats were placed in a Plexiglas recording cage (Fig.S1). EEG was recorded during 22-24 hours (in 2 rats records were shorter due to technical problems) using a multichannel amplifier (PowerLab 4/35, LabChart 8.0 software, ADInstruments, Sydney, Australia) via a swivel contact, band-pass filtered between 0.5–200 Hz, digitized with 400 samples/second/per channel and stored in the hard disk (Fig.S1).

This part of the study was approved by the Ethics Committee of Institute of the Higher Nervous Activity and Neurophysiology of the Russian Academy of Sciences (protocol № 4 approved on 26 October 2021).

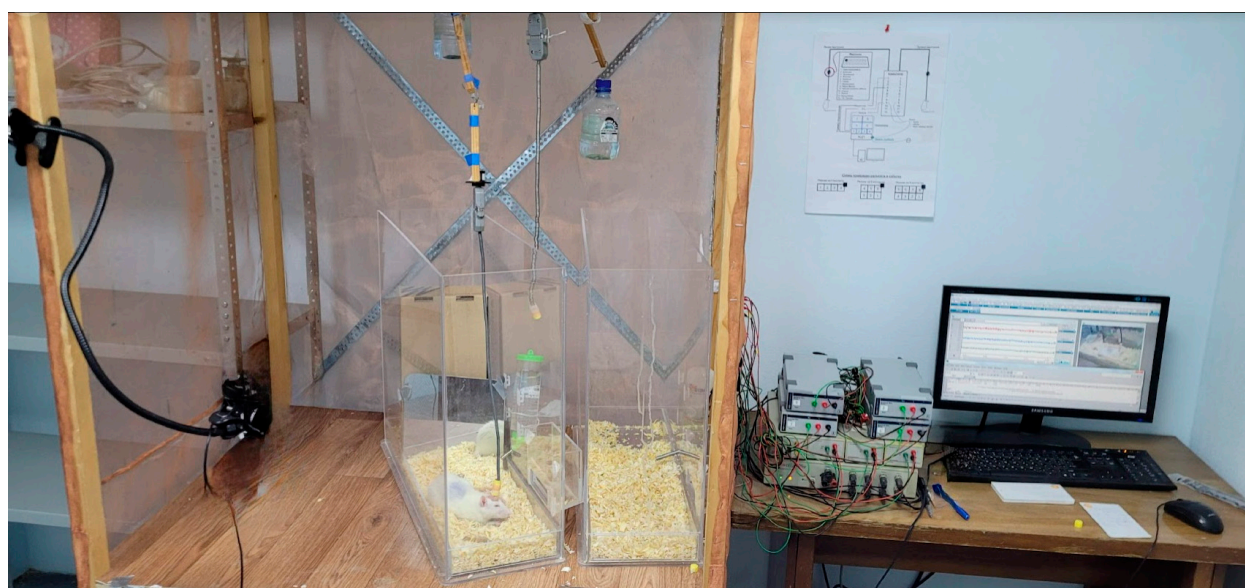

Figure S1. The photo of EEG-recording setup (PowerLab 4/35 and computer). In this particular experiment, video-EEG was recorded in a freely moving rat.

Figure S2 demonstrates regular spike-wave discharges, SWD, in EEG recorded in adult WAG/Rij rat. Typical SWD in WAG/Rij rats represents a sequence of 5-10 s high-voltage spike-wave complexes with robust onset and strong asymmetry. The amplitude of SWD usually 3-5 times exceeded the background. Spikes in SWD were very regular and repetitive. NEW rats usually expressed short-lasting SWD 2-3 s with a spindle-like envelope consisting of several spike-wave complexes (Fig. S3, the upper plot).

SWD were selected automatically using wavelet-based algorithm described in our earlier papers [1,2]. Briefly, EEG signal from the frontal EEG channel underwent a continuous wavelet transform. Wavelet power was computed in the main frequency band of SWD, W[8-10 Hz], and its 1st harmonics - W[17-20 Hz]. Threshold values for W[8-10 Hz] and W[17-20 Hz] were chosen between 100-210 and adjusted individually. In order to define the end of SWD, wavelet power was smoothed by 10-20 %.

Figure S4 demonstrates SWDs in WAG/Rij rat, which were automatically detected in the frontal EEGs (channel "EEG"), by computing wavelet power in W[8-10 Hz] and W[17-20 Hz] frequency bands with the thresholds of 170. The minimal duration of the SWD was set at 2000 ms.

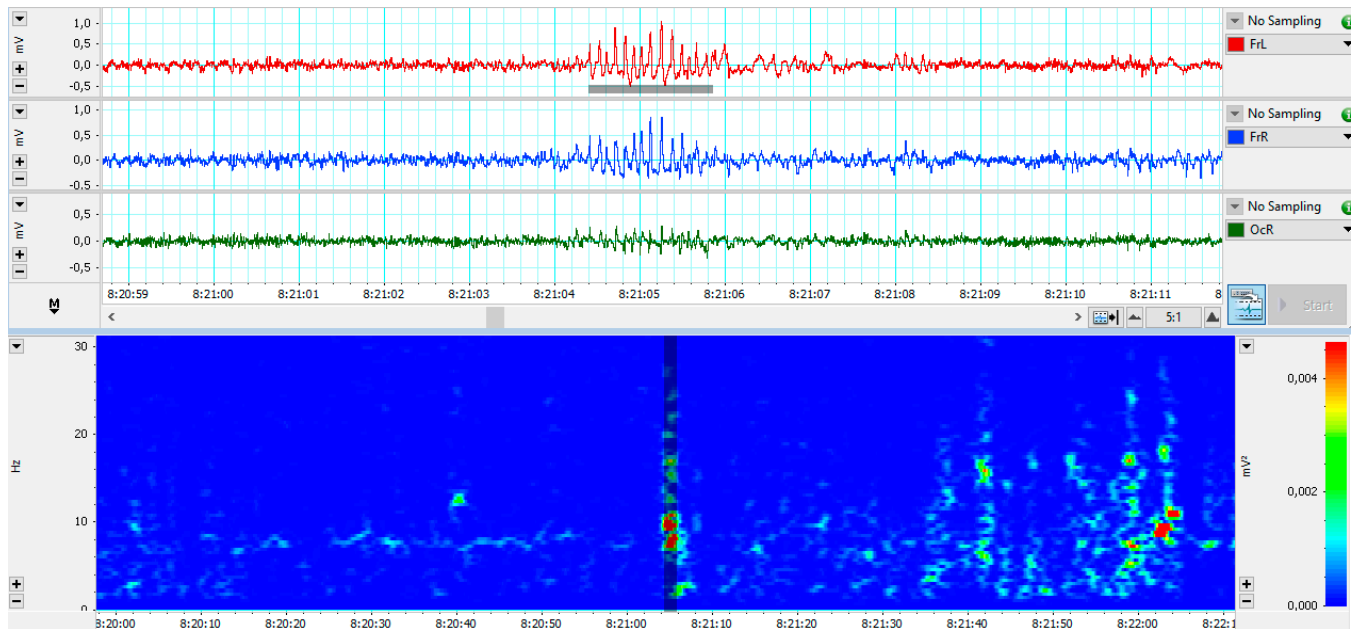

(a)

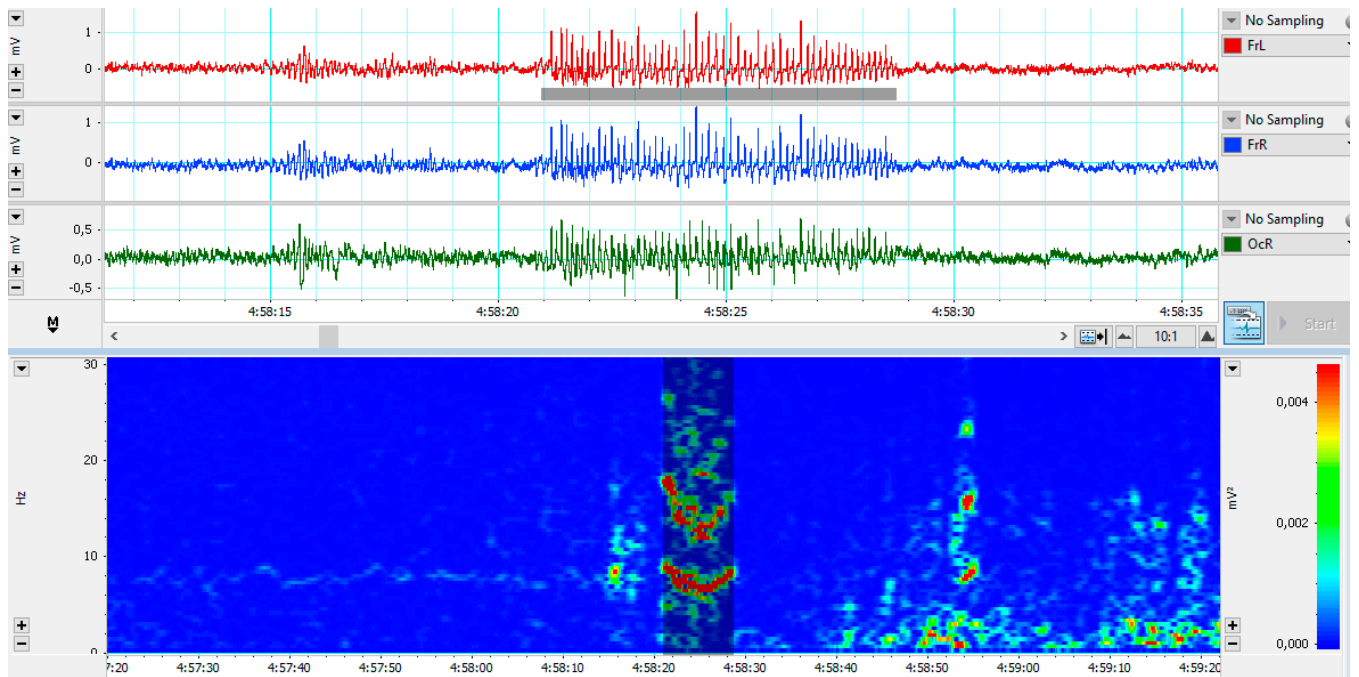

(b)

Figure S2. Examples of spike-wave discharges (SWD) as recorded in a freely moving WAG/Rij rat. (a) – Short-lasting SWD and (b) – fully blown SWD. Three-channel records were obtained at the frontal left and right cortex, FrL and FrR (symmetrical areas) and at the occipital right cortex, OcR and plotted in LabChart 8.0. Time is given in hh:mm:ss. The bottom plots show power spectra of the FrL (frontal left EEG channel) for frequencies 0-30 Hz, where spike-wave discharges are shaded. Spectra are obtained with Hann-window FFT 1024 size and 93.5% overlap. Note the difference in time scales of raw EEG and its spectrum. EEG time scales in (a) and (b) are the same.

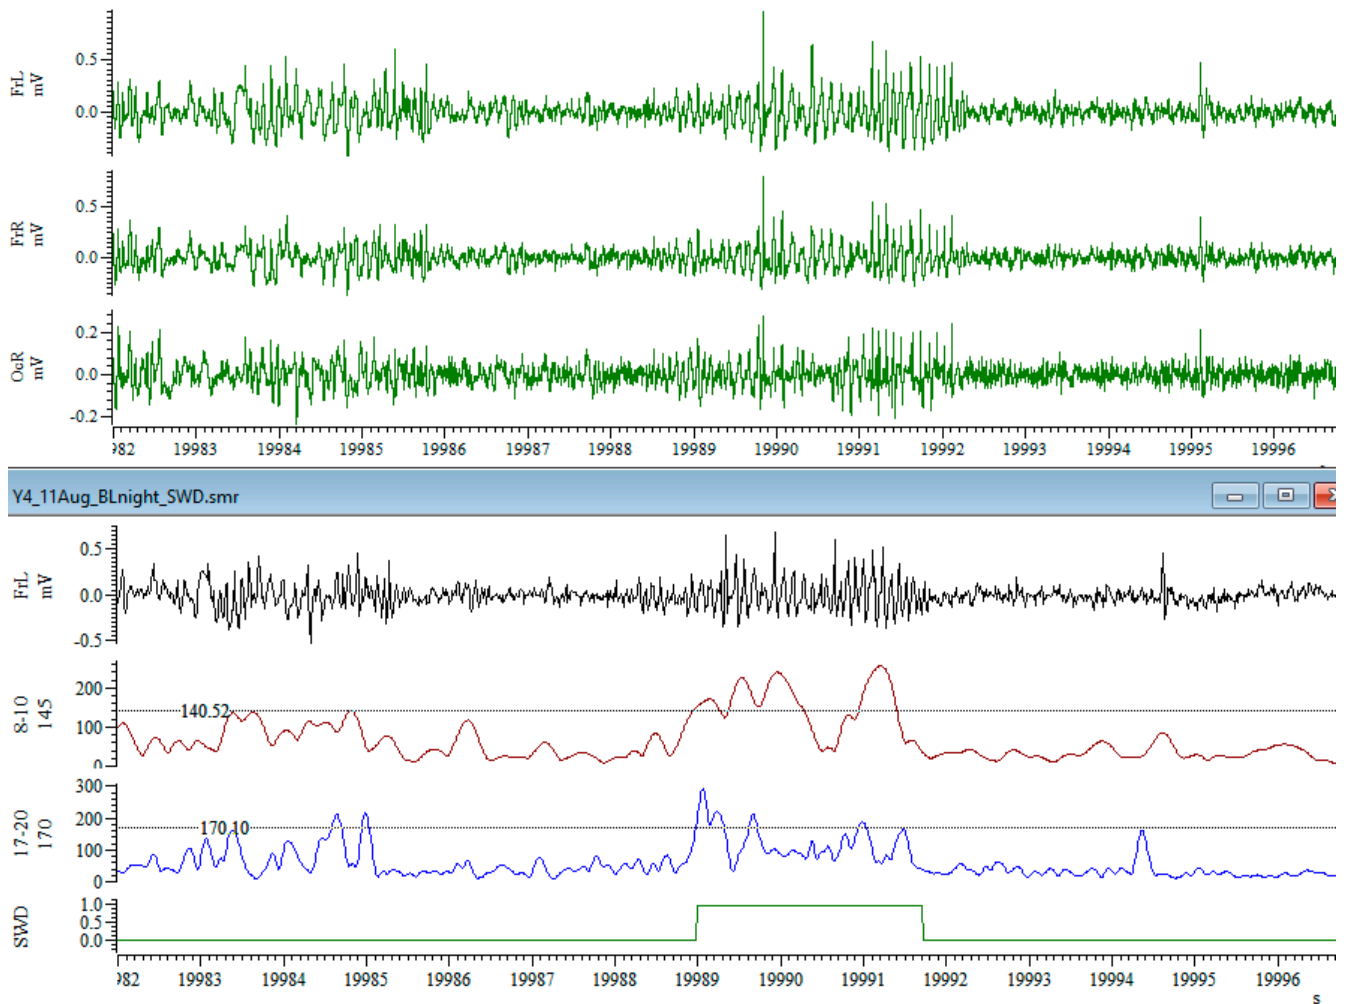

Figure S4. Short-lasting SWD as recorded with 3-channels EEG in an adult NEW rat (ID=Y4) and plotted in Spike 5. Time is given in s. The signal was recorded at the FrL and FrR (the frontal left and right cortex, symmetrical areas) and at the OcR occipital right cortex. The bottom plot shows results of automatic detection of SWD performed in FrL EEG channel; distribution of wavelet power as measured at 8-10 Hz and at 17-20 Hz - channels "W[8-10 Hz]" and "W[17-20 Hz]". The threshold level in "W[8-10 Hz]" was set at 140 and in "W[17-20 Hz]" – at 170.

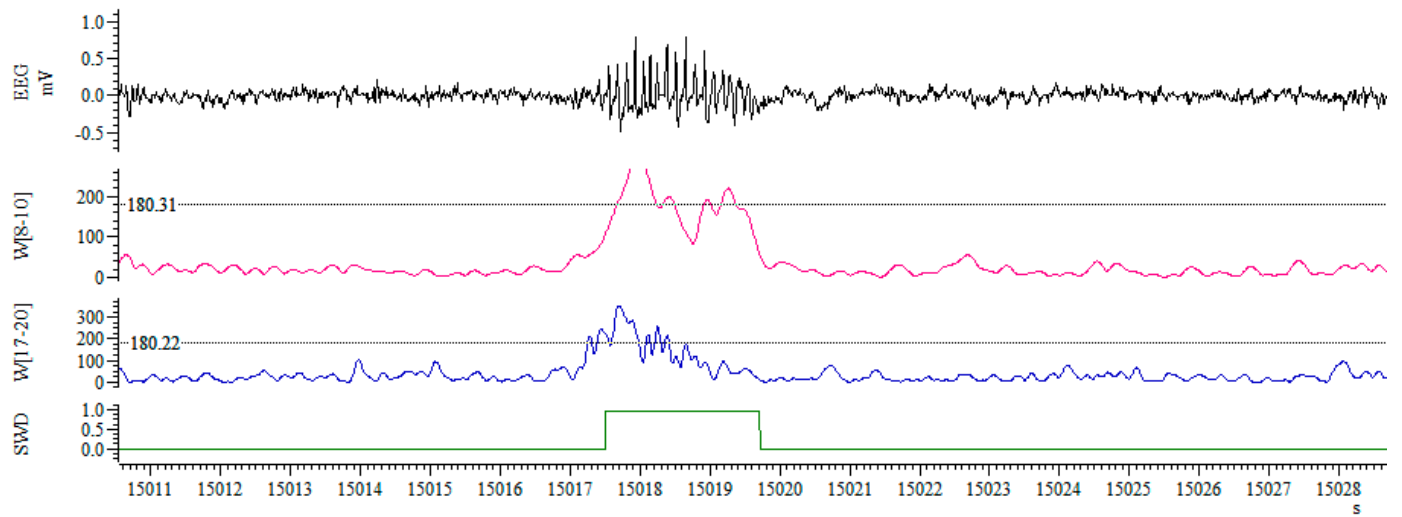

(a)

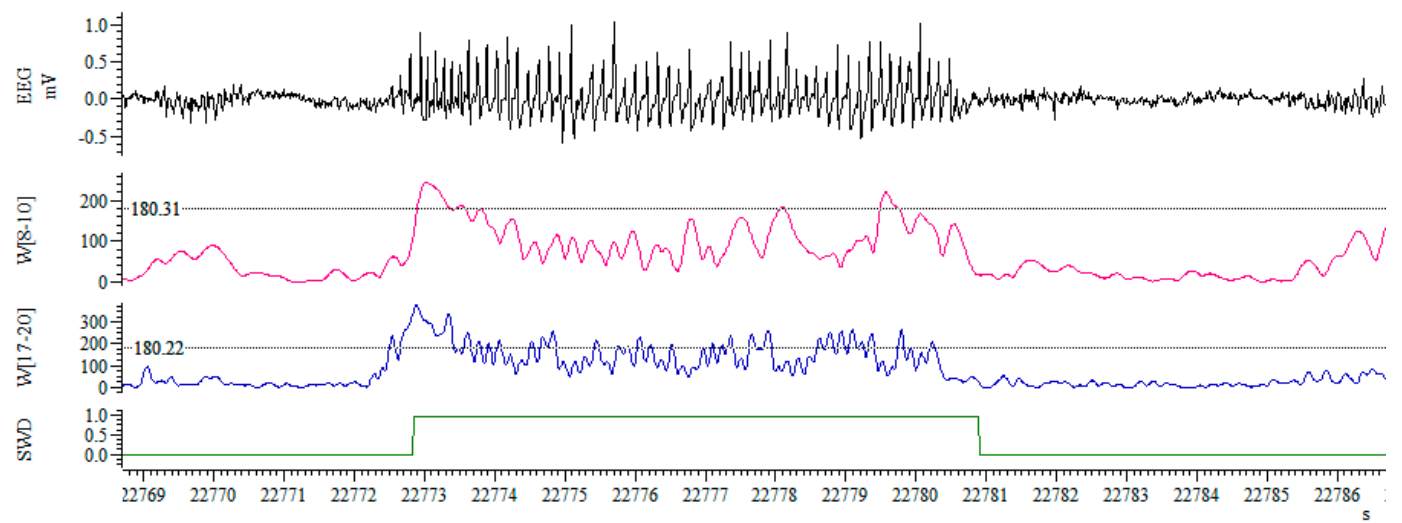

(b)

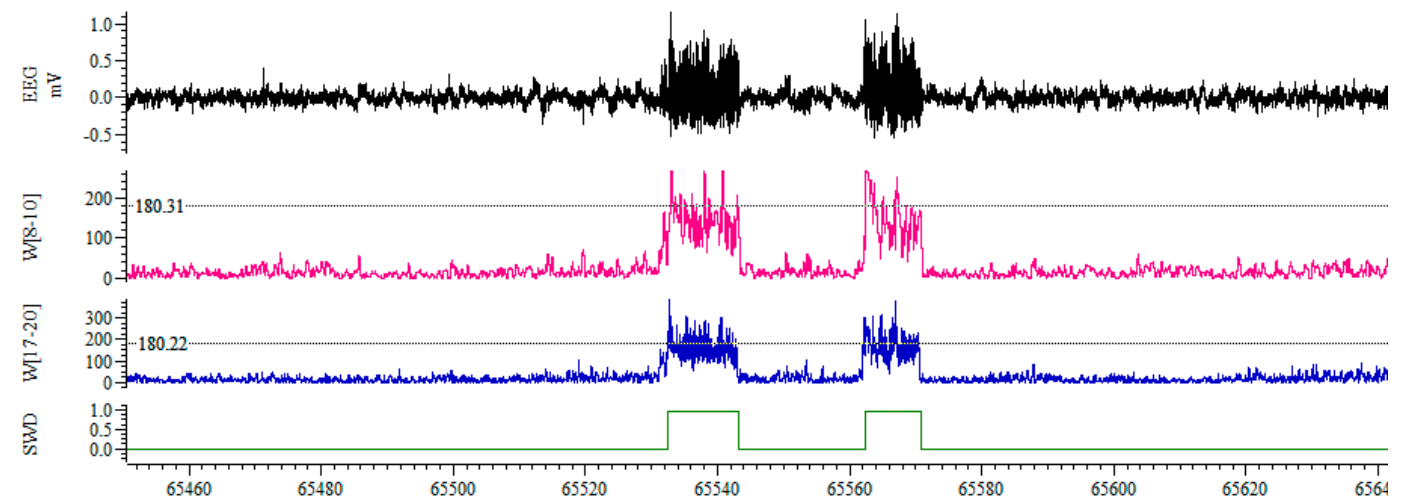

(c)

Figure S4. Details of automatic detection of spike-wave discharges (SWD) in adult WAG/Rij rat. (a) - Short-lasting SWD; (b) - a typical SWD; (c) - 192 s epoch with two SWDs. Time is given in s. The 1<sup>st</sup> channel EEG as recorded at the frontal left cortex; Channel “W[8-10 Hz]” - wavelet power was computed at 8-10 Hz; Channel “W[17-20 Hz]” - computed at 17-20 Hz. The threshold in both wavelet channels was set at 180.

Table S1. Results of automatic detection of SWD in NEW rats of Group 2.

| ID  | Channel | Band 1,<br>Hz | Threshold<br>for Band1 | Band 2,<br>Hz | Threshold<br>for Band2 | Min<br>duration<br>of SWD,<br>ms | Duration<br>of<br>analyzed<br>EEG, s | Total<br>duration<br>of SWD | Total<br>number<br>of SWD | SWD<br>density<br>s/per<br>hour | Mean<br>duration<br>of SWD |
|-----|---------|---------------|------------------------|---------------|------------------------|----------------------------------|--------------------------------------|-----------------------------|---------------------------|---------------------------------|----------------------------|
| Y1  | FrR(1)  | 8-10          | 180                    | 17-20         | 180                    | 2000                             | 70 400                               | 2.2                         | 1                         | 0.11                            | 2.20                       |
| Y2  | FrR(1)  | 8-10          | 180                    | 17-20         | 185                    | 2000                             | 40 000                               | 63.2                        | 18                        | 5.69                            | 3.51                       |
| Y4  | FrL(0)  | 8-10          | 140                    | 17-20         | 170                    | 2000                             | 54 950                               | 24.1                        | 10                        | 1.58                            | 2.41                       |
| Y9  | FrR(1)  | 8-10          | 150                    | 17-20         | 100                    | 2000                             | 89 450                               | 16.0                        | 5                         | 0.64                            | 3.20                       |
| Y0  | FrR(1)  | 8-10          | 170                    | 17-20         | 210                    | 2000                             | 74 600                               | 0.0                         | 0                         | 0.00                            |                            |
| Y00 | FrR(1)  | 8-10          | 170                    | 17-20         | 210                    | 2000                             | 78 200                               | 0.0                         | 0                         | 0.00                            |                            |
| X1  | FrL(0)  | 8-10          | 180                    | 17-20         | 180                    | 2000                             | 40 000                               | 11.0                        | 3                         | 0.99                            | 3.67                       |
| X2  | FrL(0)  | 8-10          | 180                    | 17-20         | 180                    | 2000                             | 72 400                               | 2.3                         | 1                         | 0.11                            | 2.30                       |
| X3  | FrL(1)  | 8-10          | 180                    | 17-20         | 180                    | 2000                             | 78 200                               | 4.5                         | 2                         | 0.21                            | 2.25                       |
| X4  | FrL(0)  | 8-10          | 180                    | 17-20         | 180                    | 2000                             | 74 600                               | 25.9                        | 11                        | 1.25                            | 2.35                       |
| X5  | FrL(0)  | 8-10          | 180                    | 17-20         | 180                    | 2000                             | 78 200                               | 0                           | 0                         | 0                               |                            |
| X6  | FrL(0)  | 8-10          | 180                    | 17-20         | 210                    | 2000                             | 72 400                               | 4.7                         | 2                         | 0.23                            | 2.35                       |
| X7  | FrL(0)  | 8-10          | 180                    | 17-20         | 180                    | 2000                             | 78 200                               | 6.5                         | 2                         | 0.30                            | 3.25                       |
| X8  | FrL(0)  | 8-10          | 180                    | 17-20         | 180                    | 2000                             | 72 200                               | 12.2                        | 4                         | 0.55                            | 3.01                       |

Individual data acquired by automatic detection of SWD are shown in Table S1. The length of the analyzed EEG varied from 40000 to 894500 s (11.1 - 24.8 hours), and it was limited by requirements of wavelet-based processing and by the quality of recorded EEG signal. In 13 rats SWD of Group 2, SWD density was scored in s/per hour, and it varied from 0 s (minimum) to 5,69 s (maximum). Rat Y2 had the highest value of seizure density: 5.69 s per hour, and the mean duration of SWD was 3.51 s. The other rats showed short-lasting immature spike-wave activity (Fig. A3).

## References

1. Hramov, A.E.; Koronovskii, A. A.; Makarov, V.A.; Maksimenko, V.A.; Pavlov, A.N.; Sitnikova, E. *Wavelets in Neuroscience*; Springer Series in Synergetics; Springer International Publishing: Cham, 2021; ISBN 978-3-030-75991-9.
2. Sitnikova, E.; Smirnov, K. Active Avoidance Learning in WAG/Rij Rats with Genetic Predisposition to Absence Epilepsy. *Brain Res. Bull.* **2020**, *165*, 198–208, doi:10.1016/j.brainresbull.2020.10.007.

## Supplementary S2. Results of behavioral tests in Group 1. Individual data and cluster analysis

Table S1. Clustering of rats (Group 1) according to their weight dynamics in the sucrose preference test. M1 and M1 – male cluster 1 and 2. F1 and F2 - male cluster 1 and 2.

| N  | ID    | Sex    | Weight Cluster | Weight, g |       |       | Weight dynamics, g |       |
|----|-------|--------|----------------|-----------|-------|-------|--------------------|-------|
|    |       |        |                | 0 Day     | 1 Day | 2 Day | 1 Day              | 2 Day |
| 1  | Y0_1  | male   | M1             | 418       | 423   | 420   | 5                  | -3    |
| 2  | Y0_2  | male   | M1             | 330       | 337   | 337   | 7                  | 0     |
| 3  | Y0_3  | male   | M1             | 402       | 408   | 406   | 6                  | -2    |
| 4  | Y0_4  | male   | M1             | 382       | 386   | 383   | 4                  | -3    |
| 5  | Y0_5  | male   | M1             | 407       | 410   | 410   | 3                  | 0     |
| 6  | Y00_1 | male   | M1             | 358       | 364   | 367   | 6                  | 3     |
| 7  | Y00_2 | male   | M2             | 330       | 331   | 334   | 1                  | 3     |
| 8  | Y00_3 | male   | M2             | 419       | 421   | 431   | 2                  | 10    |
| 9  | Y00_4 | male   | M2             | 390       | 390   | 395   | 0                  | 5     |
| 10 | Y00_5 | male   | M2             | 410       | 406   | 410   | -4                 | 4     |
| 11 | Y1_1  | male   | M2             | 358       | 353   | 357   | -5                 | 4     |
| 12 | Y1_2  | male   | M1             | 382       | 384   | 384   | 2                  | 0     |
| 13 | Y1_3  | male   | M2             | 364       | 365   | 372   | 1                  | 7     |
| 14 | Y1_4  | male   | M1             | 358       | 360   | 360   | 2                  | 0     |
| 15 | Y1_5  | male   | M2             | 390       | 393   | 400   | 3                  | 7     |
| 16 | Y1_6  | male   | M1             | 376       | 379   | 382   | 3                  | 3     |
| 17 | Y1_7  | male   | M1             | 361       | 362   | 362   | 1                  | 0     |
| 18 | Y2_1  | male   | M2             | 394       | 389   | 395   | -5                 | 6     |
| 19 | Y2_2  | male   | M1             | 355       | 369   | 365   | 14                 | -4    |
| 20 | Y2_3  | male   | M2             | 410       | 406   | 412   | -4                 | 6     |
| 21 | Y2_5  | male   | M2             | 345       | 343   | 344   | -2                 | 1     |
| 22 | Y3_1  | male   | M1             | 365       | 370   | 371   | 5                  | 1     |
| 23 | Y3_2  | male   | M2             | 377       | 374   | 379   | -3                 | 5     |
| 24 | Y3_3  | male   | M2             | 365       | 363   | 369   | -2                 | 6     |
| 1  | X0_1  | female | F1             | 220       | 216   | 213   | -4                 | -3    |
| 2  | X0_2  | female | F1             | 229       | 227   | 226   | -2                 | -1    |
| 3  | X0_3  | female | F2             | 232       | 222   | 218   | -10                | -4    |
| 4  | X0_4  | female | F2             | 227       | 220   | 224   | -7                 | 4     |
| 5  | X1_1  | female | F1             | 207       | 206   | 202   | -1                 | -4    |
| 6  | X1_2  | female | F2             | 215       | 208   | 205   | -7                 | -3    |
| 7  | X2_1  | female | F1             | 224       | 221   | 224   | -3                 | 3     |
| 8  | X2_2  | female | F2             | 209       | 204   | 208   | -5                 | 4     |
| 9  | X2_3  | female | F1             | 216       | 214   | 213   | -2                 | -1    |
| 10 | X3_1  | female | F1             | 209       | 208   | 209   | -1                 | 1     |
| 11 | X3_2  | female | F1             | 210       | 212   | 213   | 2                  | 1     |

Table S2. Clustering of rats (Group 1) in behavioral tests.

The sucrose preference test, weight dynamics clusters: M1 and M1 – male cluster 1 and 2. F1 and F2 – female cluster 1 and 2.

The von Frey test, clusters: L – low 50% threshold; H – high 50% threshold

| N  | ID    | Sex    | Sucrose pref.<br>weight cluster | T-maze<br>scores | T-maze<br>code | von Frey<br>cluster | von Frey<br>50% threshold |
|----|-------|--------|---------------------------------|------------------|----------------|---------------------|---------------------------|
| 1  | Y0_1  | male   | M1                              | no preference    | RRL0L          | L                   | 0.00126                   |
| 2  | Y0_2  | male   | M1                              | R                | LRRR0          | L                   | 0.00424                   |
| 3  | Y0_3  | male   | M1                              | no preference    | LRLR0          | H                   | 0.01453                   |
| 4  | Y0_4  | male   | M1                              | R                | RLRRR          | H                   | 0.01345                   |
| 5  | Y0_5  | male   | M1                              | L                | RLLLR          | H                   | 0.01016                   |
| 6  | Y00_1 | male   | M1                              | L                | LLR00          | L                   | 0.00174                   |
| 7  | Y00_2 | male   | M2                              | R                | RRLR0          | H                   | 0.0489                    |
| 8  | Y00_3 | male   | M2                              | passive          | LL000          | L                   | 0.00302                   |
| 9  | Y00_4 | male   | M2                              | R                | RLRRR          | L                   | 0.00503                   |
| 10 | Y00_5 | male   | M2                              | R                | RLR00          | L                   | 0.00541                   |
| 11 | Y1_1  | male   | M2                              | no preference    | LRL0R          | L                   | 0.00092                   |
| 12 | Y1_2  | male   | M1                              | R                | RLR00          | H                   | 0.035                     |
| 13 | Y1_3  | male   | M2                              | no preference    | RLR0L          | L                   | 0.00745                   |
| 14 | Y1_4  | male   | M1                              | no preference    | RLL0R          | H                   | 0.01161                   |
| 15 | Y1_5  | male   | M2                              | no preference    | LLR0R          | L                   | 0.00807                   |
| 16 | Y1_6  | male   | M1                              | no preference    | LR0LR          | H                   | 0.035                     |
| 17 | Y1_7  | male   | M1                              | no preference    | LR0LR          | H                   | 0.035                     |
| 18 | Y2_1  | male   | M2                              | no preference    | RLR0L          | L                   | 0.00503                   |
| 19 | Y2_2  | male   | M1                              | passive          | R00L0          | H                   | 0.01453                   |
| 20 | Y2_3  | male   | M1                              | passive          | 0000L          | L                   | 0.00697                   |
| 21 | Y2_5  | male   | M2                              | no preference    | RLR0L          | L                   | 0.00218                   |
| 22 | Y3_1  | male   | M1                              | R                | RLRRL          | L                   | 0.00807                   |
| 23 | Y3_2  | male   | M2                              | L                | RLL00          | H                   | 0.035                     |
| 24 | Y3_3  | male   | M2                              | L                | LRLLR          | H                   | 0.01341                   |
| 1  | X0_1  | female | F1                              | no preference    | RLLR0          | L                   | 0.00872                   |
| 2  | X0_2  | female | F1                              | no preference    | LRLR0          | L                   | 0.00503                   |
| 3  | X0_3  | female | F2                              | L                | LRLLR          | L                   | 0.00946                   |
| 4  | X0_4  | female | F2                              | R                | LRR00          | H                   | 0.01453                   |
| 5  | X1_1  | female | F1                              | no preference    | LRRL0          | L                   | 0.00568                   |
| 6  | X1_2  | female | F2                              | R                | RLRLR          | L                   | 0.00609                   |
| 7  | X2_1  | female | F1                              | L                | RLL00          | L                   | 0.00609                   |
| 8  | X2_2  | female | F2                              | L                | LLL00          | L                   | 0.00122                   |
| 9  | X2_3  | female | F1                              | no preference    | LRRL0          | L                   | 0.00783                   |
| 10 | X3_1  | female | F1                              | R                | RR0LR          | L                   | 0.00218                   |
| 11 | X3_2  | female | F1                              | no preference    | LRR00          | L                   | 0.00745                   |
